# Supplementary material for: Molecular Characteristics and Metastasis Predictor Genes of Triple-Negative Breast Cancer: A Clinical Study of Triple-Negative Breast Carcinomas
Source: PubMed Central journal article supplement (PMC3458056; doi:10.1371/journal.pone.0045831), 2012-09-25

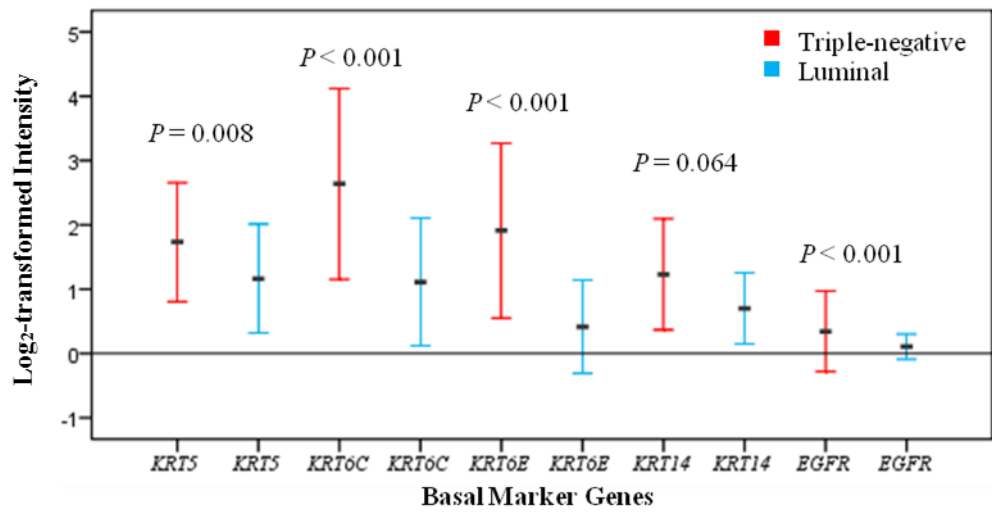

Supplement: pone.0045831.s003.pdf [file pone.0045831.s003.pdf]
