# Supplementary material for: Molecular Characteristics and Metastasis Predictor Genes of Triple-Negative Breast Cancer: A Clinical Study of Triple-Negative Breast Carcinomas
Source: PubMed Central journal article supplement (PMC3458056; doi:10.1371/journal.pone.0045831), 2012-09-25
Supplement: pone.0045831.s004.pdf [file pone.0045831.s004.pdf]

| Characteristic                     | N  | Distant<br>metastasis-positive<br>n (%) | Distant<br>metastasis-negative<br>n (%) | <i>P</i> value |
|------------------------------------|----|-----------------------------------------|-----------------------------------------|----------------|
| <b>Age at diagnosis</b>            | 48 |                                         |                                         | 0.090          |
| < 50                               |    | 0                                       | 13 (33.3)                               |                |
| ≥ 50                               |    | 9 (100.0)                               | 26 (66.7)                               |                |
| <b>Stage</b>                       | 48 |                                         |                                         | 0.106          |
| I/II                               |    | 5 (55.6)                                | 32 (82.1)                               |                |
| III                                |    | 4 (44.4)                                | 7 (17.9)                                |                |
| <b>Tumor size</b>                  | 48 |                                         |                                         | 0.578          |
| ≤5cm                               |    | 7 (77.8)                                | 35 (89.7)                               |                |
| > 5cm                              |    | 2 (22.2)                                | 4 (10.3)                                |                |
| <b>Grade</b>                       | 45 |                                         |                                         | 0.542          |
| Low/Intermediate                   |    | 3 (37.5)                                | 12 (32.4)                               |                |
| High                               |    | 5 (62.5)                                | 25 (67.6)                               |                |
| <b>Lymph node metastasis</b>       | 48 |                                         |                                         | 0.073          |
| Negative                           |    | 3 (33.3)                                | 26 (66.7)                               |                |
| Positive                           |    | 6 (66.7)                                | 13 (33.3)                               |                |
| <b>Lymphovascular<br/>invasion</b> | 44 |                                         |                                         | 0.206          |
| Negative                           |    | 2 (28.6)                                | 20 (54.1)                               |                |
| Positive                           |    | 5 (71.4)                                | 17 (45.9)                               |                |
| <b>Mitotic count</b>               | 45 |                                         |                                         | 0.513          |
| ≤14                                |    | 4 (50.0)                                | 21 (56.7)                               |                |
| > 14                               |    | 4 (50.0)                                | 16 (43.2)                               |                |
| <b>Nuclear pleomorphism</b>        | 45 |                                         |                                         | 0.579          |
| Low/Intermediate                   |    | 2 (25.0)                                | 8 (21.6)                                |                |
| High                               |    | 6 (75.0)                                | 29 (78.4)                               |                |
| <b>Tubule formation</b>            | 45 |                                         |                                         | 0.439          |
| ≥10%                               |    | 2 (25.0)                                | 6 (16.2)                                |                |
| < 10%                              |    | 6 (75.0)                                | 31 (83.8)                               |                |
