# Supplementary material for: Molecular Characteristics and Metastasis Predictor Genes of Triple-Negative Breast Cancer: A Clinical Study of Triple-Negative Breast Carcinomas
Source: PubMed Central journal article supplement (PMC3458056; doi:10.1371/journal.pone.0045831), 2012-09-25
Supplement: pone.0045831.s005.pdf [file pone.0045831.s005.pdf]

| Affymetrix probe ID | Gene symbol    | Gene description                                                                                                 |
|---------------------|----------------|------------------------------------------------------------------------------------------------------------------|
| 203264_s_at         | <i>ARHGEF9</i> | Cdc42 guanine nucleotide exchange factor (GEF) 9                                                                 |
| 214052_x_at         | <i>BAT2D1</i>  | CDNA FLJ20183 fis, clone COLF0283                                                                                |
| 204775_at           | <i>CHAF1B</i>  | Chromatin assembly factor 1, subunit B (p60)                                                                     |
| 219867_at           | <i>CHODL</i>   | Chondrolectin                                                                                                    |
| 206165_s_at         | <i>CLCA2</i>   | Chloride channel regulator 2                                                                                     |
| 213379_at           | <i>COQ2</i>    | Coenzyme Q2 homolog, prenyltransferase                                                                           |
| 207639_at           | <i>FZD9</i>    | Frizzled homolog 9 (Drosophila)                                                                                  |
| 219473_at           | <i>GDAP2</i>   | Ganglioside induced differentiation associated protein 2                                                         |
| 201348_at           | <i>GPX3</i>    | Glutathione peroxidase 3 (plasma)                                                                                |
| 207020_at           | <i>HSF2BP</i>  | Heat shock transcription factor 2 binding protein                                                                |
| 210015_s_at         | <i>MAP2</i>    | Microtubule-associated protein 2                                                                                 |
| 201874_at           | <i>MPZL1</i>   | Myelin protein zero-like 1                                                                                       |
| 206538_at           | <i>MRAS</i>    | Muscle RAS oncogene homolog                                                                                      |
| 205932_s_at         | <i>MSX1</i>    | Msh homeobox 1                                                                                                   |
| 213906_at           | <i>MYBL1</i>   | V-myb myeloblastosis viral oncogene homolog (avian)-like 1                                                       |
| 211466_at           | <i>NFIB</i>    | Nuclear factor I/B                                                                                               |
| 202238_s_at         | <i>NNMT</i>    | Nicotinamide N-methyltransferase                                                                                 |
| 219582_at           | <i>OGFRL1</i>  | Opioid growth factor receptor-like 1                                                                             |
| 213030_s_at         | <i>PLXNA2</i>  | Plexin A2                                                                                                        |
| 220113_x_at         | <i>POLR1B</i>  | Polymerase (RNA) I polypeptide B, 128kDa                                                                         |
| 202098_s_at         | <i>PRMT2</i>   | Protein arginine methyltransferase 2                                                                             |
| 203160_s_at         | <i>RNF8</i>    | Ring finger protein 8                                                                                            |
| 205334_at           | <i>S100A1</i>  | S100 calcium binding protein A1                                                                                  |
| 205475_at           | <i>SCRG1</i>   | Scrapie responsive protein 1                                                                                     |
| 219039_at           | <i>SEMA4C</i>  | Sema domain, immunoglobulin domain (Ig), transmembrane domain (TM) and short cytoplasmic domain, (semaphorin) 4C |
| 217815_at           | <i>SUPT16H</i> | Suppressor of Ty 16 homolog (S. cerevisiae)                                                                      |
| 203715_at           | <i>TBCE</i>    | Tubulin folding cofactor E                                                                                       |
| 203084_at           | <i>TGFB1</i>   | Transforming growth factor, beta 1                                                                               |
| 213301_x_at         | <i>TRIM24</i>  | Tripartite motif-containing 24                                                                                   |
| 221765_at           | <i>UGCG</i>    | UDP-glucose ceramide glucosyltransferase                                                                         |
| 208358_s_at         | <i>UGT8</i>    | UDP glycosyltransferase 8                                                                                        |
| 219330_at           | <i>VANGL1</i>  | Vang-like 1 (van gogh, Drosophila)                                                                               |
