# Supplementary material for: Molecular Characteristics and Metastasis Predictor Genes of Triple-Negative Breast Cancer: A Clinical Study of Triple-Negative Breast Carcinomas
Source: PubMed Central journal article supplement (PMC3458056; doi:10.1371/journal.pone.0045831), 2012-09-25
Supplement: pone.0045831.s006.pdf [file pone.0045831.s006.pdf]

| Specimen ID | Age<br>(years) | Clinical<br>T stage | Clinical<br>nodal<br>status | Clinical<br>AJCC<br>stage | Grade | Recurrence<br>status | Recurrence-free<br>(years) | Pearson<br>correlation<br>coefficient |
|-------------|----------------|---------------------|-----------------------------|---------------------------|-------|----------------------|----------------------------|---------------------------------------|
| GSM615640   | 49.0           | T3                  | N0                          | IIB                       | 3     | 1                    | 1.19                       | 0.89                                  |
| GSM615733   | 64.0           | T2                  | N0                          | IIA                       | 3     | 0                    | 2.19                       | 0.85                                  |
| GSM615739   | 53.0           | T3                  | N0                          | IIB                       | 3     | 1                    | 1.65                       | 0.82                                  |
| GSM615650   | 60.1           | T3                  | N0                          | IIB                       | 3     | 0                    | 4.77                       | 0.82                                  |
| GSM615687   | 39.0           | T3                  | N0                          | IIB                       | 3     | 1                    | 1.26                       | 0.81                                  |
| GSM615800   | 40.0           | T4                  | N0                          | IIIB                      | 3     | 1                    | 0.88                       | 0.80                                  |
| GSM615689   | 40.0           | T3                  | N0                          | IIB                       | 3     | 1                    | 2.03                       | 0.80                                  |
| GSM615757   | 62.6           | T1                  | N0                          | I                         | 2     | 1                    | 0.76                       | 0.78                                  |
| GSM615715   | 50.0           | T2                  | N0                          | IIA                       | 3     | 0                    | 2.82                       | 0.78                                  |
| GSM615793   | 53.0           | T4                  | N0                          | IIIB                      | NA    | 0                    | 2.98                       | 0.77                                  |
| GSM615681   | 52.8           | T2                  | N0                          | IIA                       | NA    | 1                    | 1.23                       | 0.76                                  |
| GSM615707   | 63.0           | T2                  | N0                          | IIA                       | 3     | 0                    | 4.79                       | 0.76                                  |
| GSM615672   | 49.6           | T3                  | N0                          | IIB                       | NA    | 0                    | 2.86                       | 0.74                                  |
| GSM615637   | 34.1           | T3                  | N0                          | IIB                       | 3     | 0                    | 4.94                       | 0.73                                  |
| GSM615763   | 45.2           | T2                  | N0                          | IIA                       | 3     | 0                    | 6.09                       | 0.72                                  |
| GSM615828   | 45.0           | T2                  | N0                          | IIA                       | 1     | 0                    | 3.08                       | 0.71                                  |
| GSM615744   | 48.0           | T2                  | N0                          | IIA                       | 3     | 0                    | 1.79                       | 0.71                                  |
| GSM615813   | 68.0           | T3                  | N0                          | IIB                       | 3     | 0                    | 3.70                       | 0.63                                  |
| GSM615764   | 61.8           | T2                  | N0                          | IIA                       | 3     | 0                    | 5.59                       | 0.63                                  |
| GSM615824   | 46.0           | T2                  | N0                          | IIA                       | 3     | 0                    | 3.18                       | 0.61                                  |
| GSM615680   | 48.4           | T3                  | N0                          | IIB                       | 3     | 0                    | 3.93                       | 0.59                                  |
| GSM615671   | 38.6           | T3                  | N0                          | IIB                       | 2     | 0                    | 3.96                       | 0.56                                  |
