# Supplementary material for: Molecular Characteristics and Metastasis Predictor Genes of Triple-Negative Breast Cancer: A Clinical Study of Triple-Negative Breast Carcinomas
Source: PubMed Central journal article supplement (PMC3458056; doi:10.1371/journal.pone.0045831), 2012-09-25
Supplement: pone.0045831.s007.pdf [file pone.0045831.s007.pdf]

| Characteristic                             | N   | Triple-negative | Luminal       | <i>P</i> value |
|--------------------------------------------|-----|-----------------|---------------|----------------|
|                                            |     | breast cancer   | breast cancer |                |
|                                            |     | n (%)           | n (%)         |                |
| <b>Age at diagnosis</b>                    | 157 |                 |               | 0.010*         |
| < 50                                       |     | 14 (27.5)       | 53 (50.0)     |                |
| ≥ 50                                       |     | 37 (72.5)       | 53 (50.0)     |                |
| <b>Stage</b>                               | 157 |                 |               | 0.200**        |
| I                                          |     | 12 (23.5)       | 17 (16.0)     |                |
| II                                         |     | 25 (49.0)       | 45 (42.5)     |                |
| III/IV                                     |     | 14 (27.5)       | 44 (41.5)     |                |
| <b>Tumor size</b>                          | 157 |                 |               | 0.979**        |
| < 2cm                                      |     | 15 (29.4)       | 31 (29.2)     |                |
| 2cm-5cm                                    |     | 28 (54.9)       | 57 (53.8)     |                |
| > 5cm or direct extension<br>to chest wall |     | 8 (15.7)        | 18 (17.0)     |                |
| <b>Grade</b>                               | 145 |                 |               | < 0.001*       |
| Low/Intermediate                           |     | 15 (31.9)       | 75 (76.5)     |                |
| High                                       |     | 32 (68.1)       | 23 (23.5)     |                |
| <b>Mitotic count</b>                       | 142 |                 |               | < 0.001*       |
| ≤14                                        |     | 26 (55.3)       | 81 (85.3)     |                |
| > 14                                       |     | 21 (44.7)       | 14 (14.7)     |                |
| <b>Nuclear pleomorphism</b>                | 142 |                 |               | < 0.001*       |
| Low/Intermediate                           |     | 10 (21.3)       | 62 (65.3)     |                |
| High                                       |     | 37 (78.7)       | 33 (34.7)     |                |
| <b>Tubule formation</b>                    | 142 |                 |               | 0.012*         |
| ≥10%                                       |     | 8 (17.0)        | 36 (37.9)     |                |
| < 10%                                      |     | 39 (83.0)       | 59 (62.1)     |                |

\* *P* value was calculated by using the Fisher's exact test.

\*\* *P* value was calculated by using the Pearson's chi-squared test.
