# Supplementary material for: Molecular Characteristics and Metastasis Predictor Genes of Triple-Negative Breast Cancer: A Clinical Study of Triple-Negative Breast Carcinomas
Source: PubMed Central journal article supplement (PMC3458056; doi:10.1371/journal.pone.0045831), 2012-09-25
Supplement: pone.0045831.s008.pdf [file pone.0045831.s008.pdf]

| Prognostic factor                                         | Univariate analysis      |                | Multivariate analysis    |                |
|-----------------------------------------------------------|--------------------------|----------------|--------------------------|----------------|
|                                                           | Hazard ratio<br>(95% CI) | <i>P</i> value | Hazard ratio<br>(95% CI) | <i>P</i> value |
| <b>Stage:</b> III vs I/II                                 | 2.79 (0.75-10.39)        | 0.127          | 0.41 (0-105.71)          | 0.755          |
| <b>Tumor size:</b> >5cm vs ≤5cm                           | 2.08 (0.43-10.04)        | 0.361          | 0.05 (0-64.32)           | 0.416          |
| <b>Grade:</b> high vs low/intermediate                    | 0.75 (0.18-3.15)         | 0.696          | 0.14 (0-7.50)            | 0.330          |
| <b>Lymph node metastasis:</b> positive<br>vs negative     | 3.24 (0.81-13.00)        | 0.097          | 6.68 (0.01-472.00)       | 0.571          |
| <b>Mitotic count:</b> >14 vs ≤14                          | 1.31 (0.33-5.25)         | 0.704          | 1.10 (0-695.08)          | 0.977          |
| <b>Nuclear pleomorphism:</b><br>low/intermediate vs high  | 1.17 (0.24-5.79)         | 0.851          | 6.56 (0.35-124.73)       | 0.211          |
| <b>Tubule formation:</b> ≥10% vs <10%                     | 1.61 (0.32-7.97)         | 0.562          | 0.56 (0-85.39)           | 0.822          |
| <b>45-gene signature:</b> poor vs good<br>prognosis group | 78.82 (9.56-650.22)      | < 0.001        | 623.18 (7.50-5176.00)    | 0.004          |
